# Supplementary material for: Self-Assembly and -Cross-Linking Lamellar Films by Nanophase Separation with Solvent-Induced Anisotropic Structural Changes
Source: PubMed Central journal article supplement — ACS Omega. 2022 May 6;7(19):16778–84. doi: 10.1021/acsomega.2c01675 (PMC9126610; doi:10.1021/acsomega.2c01675), 2022-05-06
Supplement: ao2c01675_si_001.pdf [file ao2c01675_si_001.pdf]

# Supporting Information

## Self-Assembly and -Cross-Linking Lamellar Films by Nanophase Separation with Solvent-Induced Anisotropic Structural Changes

*Kohei Amada<sup>†</sup>, Manabu Ishizaki<sup>‡</sup>, Masato Kurihara<sup>‡</sup> and Jun Matsui<sup>†\*</sup>*

<sup>†</sup>Graduate School of Science and Engineering, <sup>‡</sup>Faculty of Science Yamagata University, 1-4-12  
Kojirakawa -machi, Yamagata 990-8560, Japan

**Table S1.** Synthesis condition of copolymer and composition, molecular weight, polydispersity and thermal property

| run | copolymer                    | molar ratio<br>DDA/TMSPA<br>in feed | molar ratio<br>DDA/TMSPA<br>in product | $M_n / 10^4$ | $M_w/M_n$ | $T_g / ^\circ\text{C}$ | $T_M / ^\circ\text{C}$ | $T_{5d} / ^\circ\text{C}$ |
|-----|------------------------------|-------------------------------------|----------------------------------------|--------------|-----------|------------------------|------------------------|---------------------------|
| 1   | p(DDA/TMSPA13) <sup>a)</sup> | 74 : 26                             | 87 : 13                                | 2.52         | 2.06      | 39.6                   | -37.8                  | 328                       |

a) Polymerized at 60 °C for 12 h.

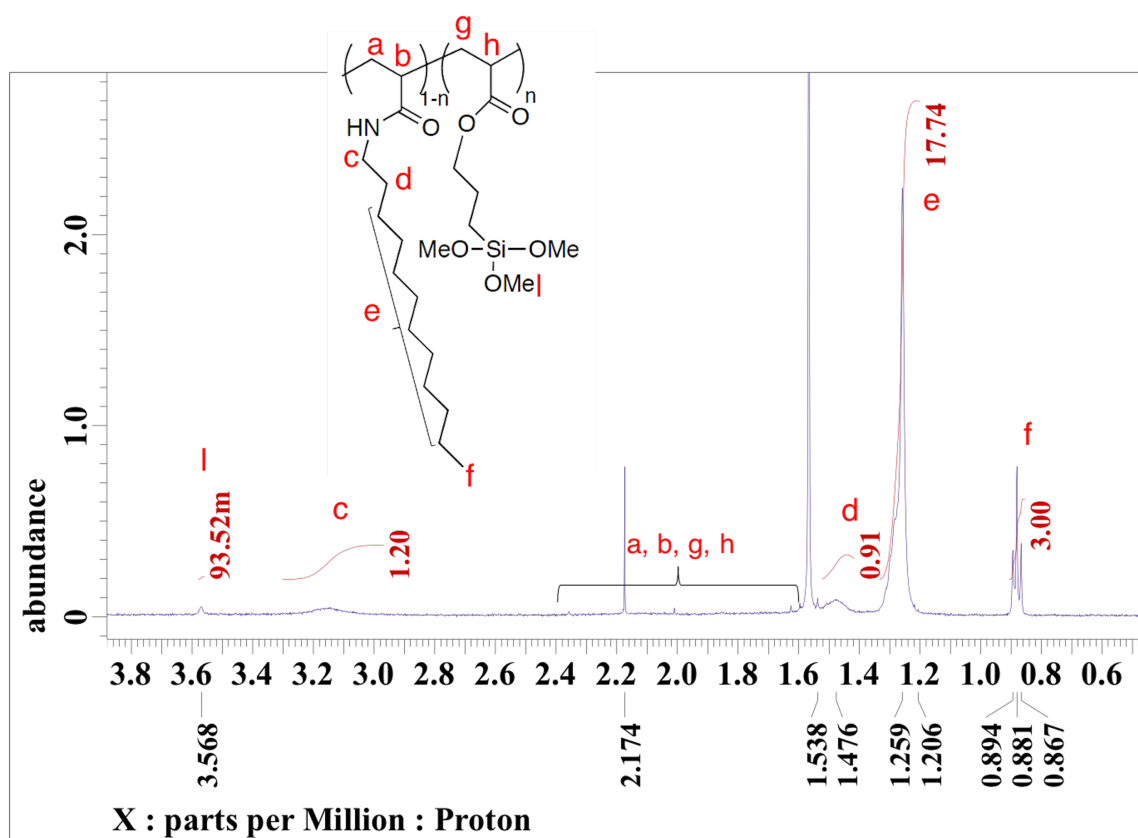

**Figure S1.** <sup>1</sup>H NMR spectrum of p(DDA/TMSPA1).

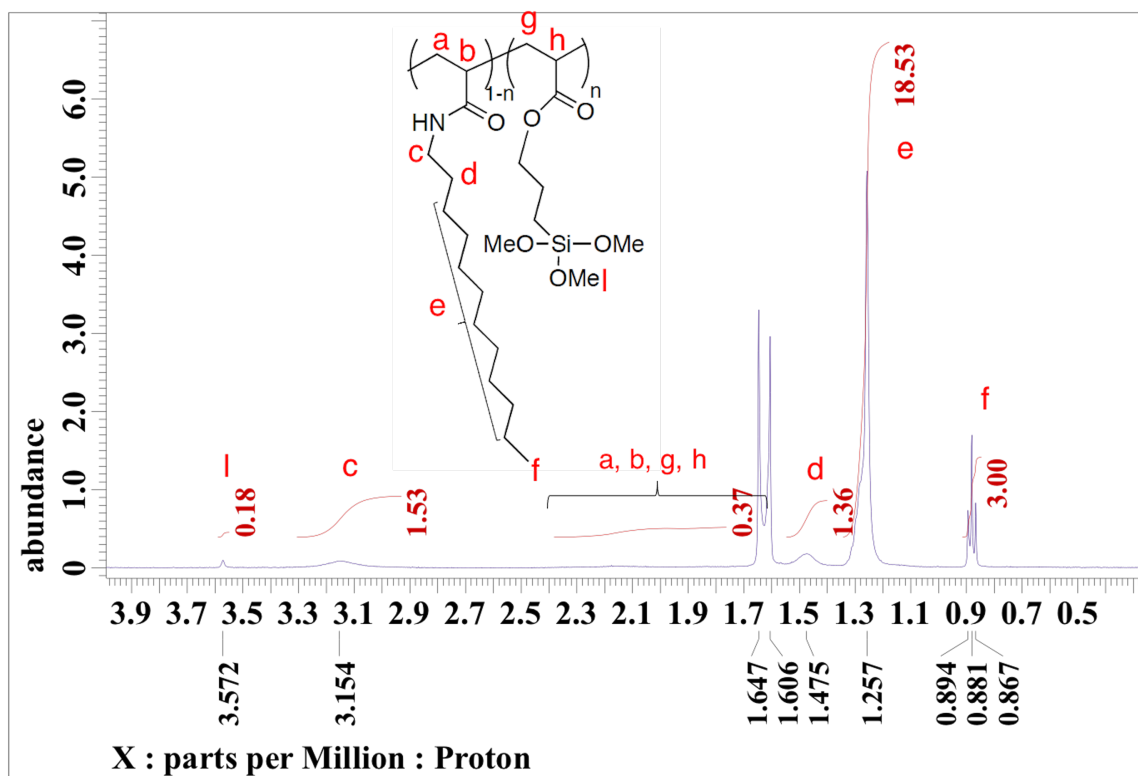

Figure S2. <sup>1</sup>H NMR spectrum of p(DDA/TMSPA2).

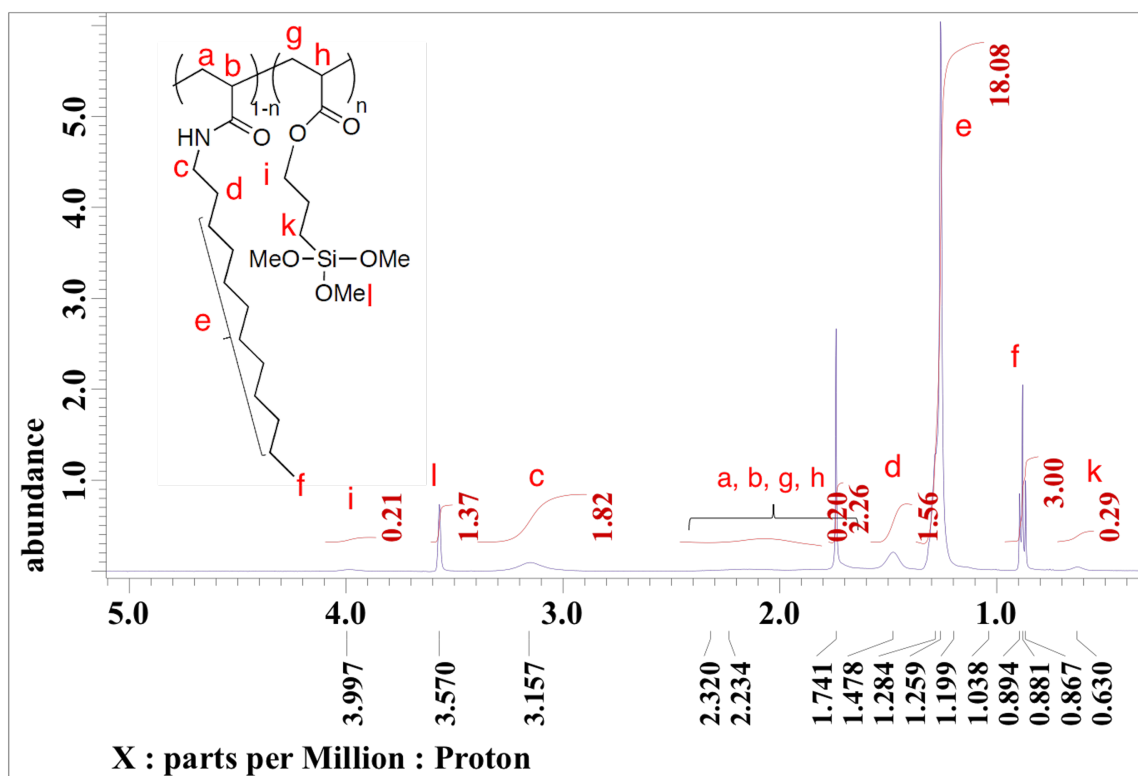

Figure S3. <sup>1</sup>H NMR spectrum of p(DDA/TMSPA13).

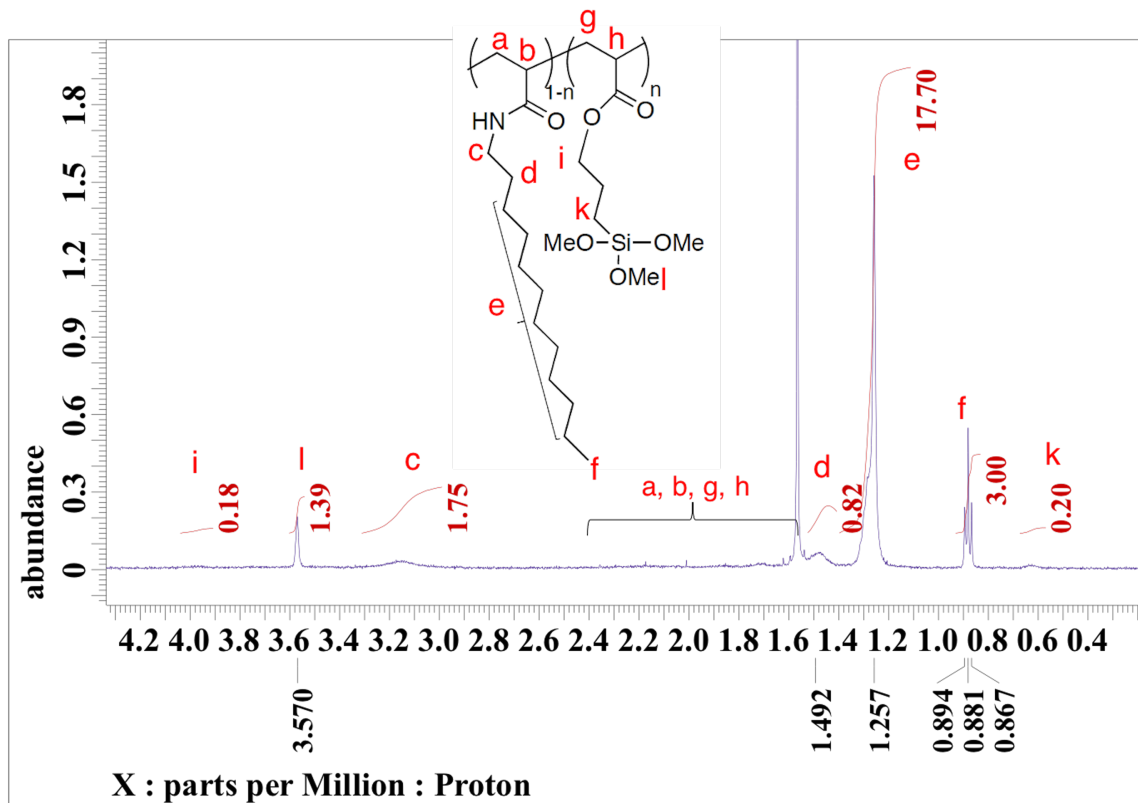

Figure S4. <sup>1</sup>H NMR spectrum of p(DDA/TMSPA13) synthesized by run 1 of Table S1.

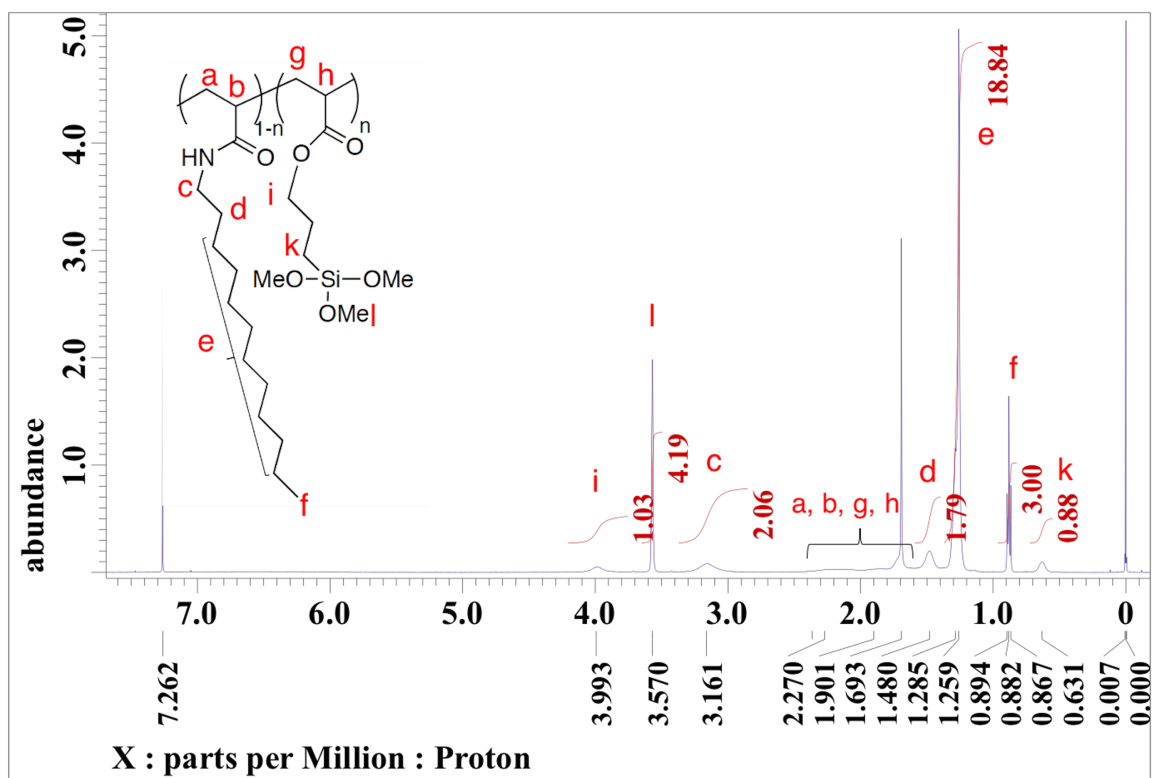

Figure S5. <sup>1</sup>H NMR spectrum of p(DDA/TMSPA32).

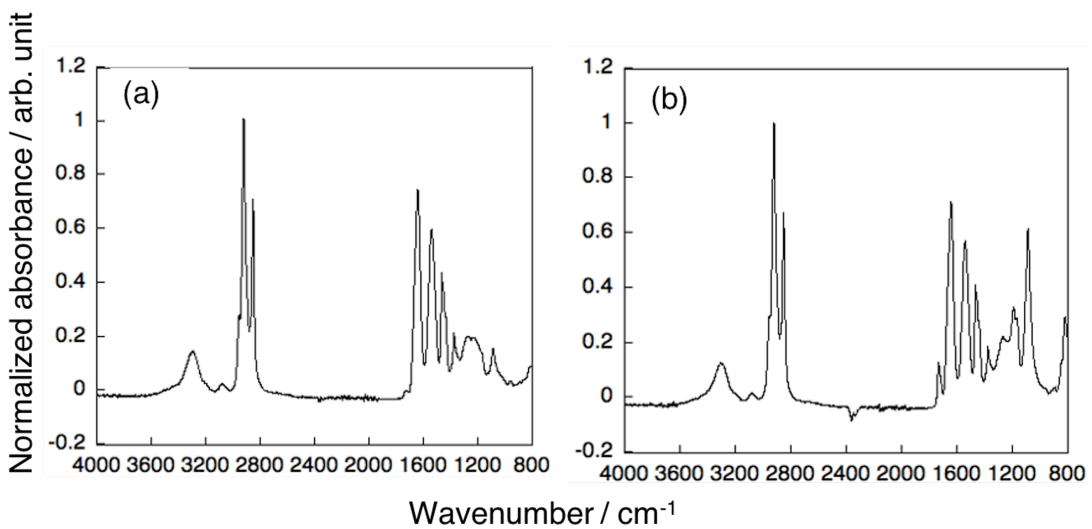

**Figure S6.** FT-IR spectra of (a) p(DDA/TMSPA2) and (b) p(DDA/TMSPA13). The spectra were normalized using the asymmetric stretching vibration of CH<sub>2</sub>.

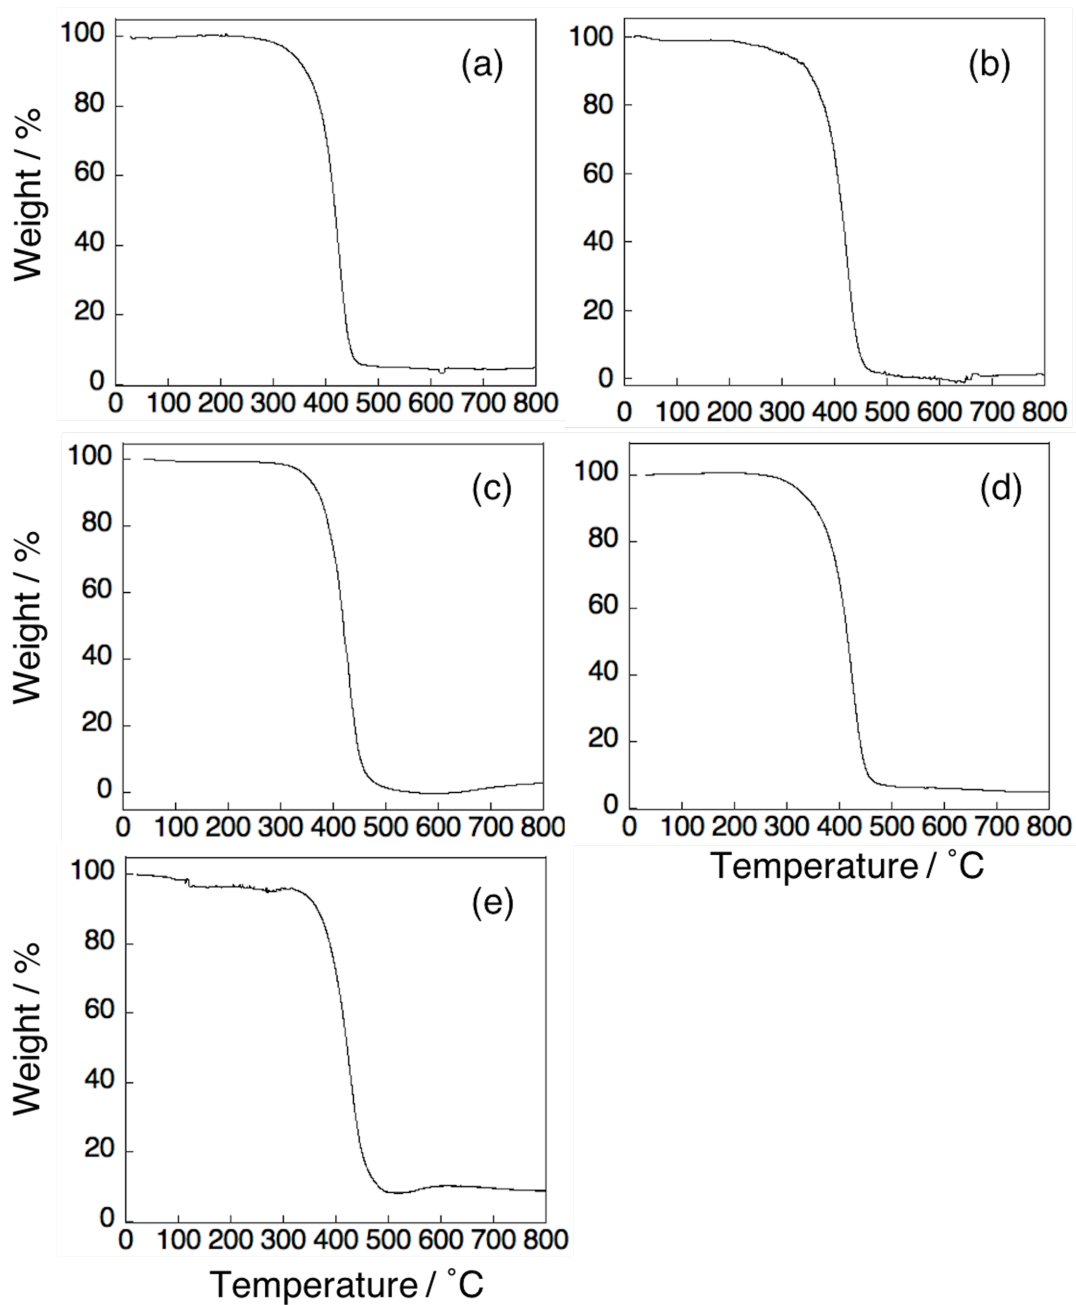

**Figure S7.** TGA curves of p(DDA/TMSPA) at a heating rate of  $10\text{ }^{\circ}\text{C min}^{-1}$  under nitrogen atmosphere. (a) p(DDA/TMSPA1), (b) p(DDA/TMSPA2), (c) p(DDA/TMSPA13), (d) p(DDA/TMSPA13) which was run 1 of Table S1 and (e) p(DDA/TMSPA32).



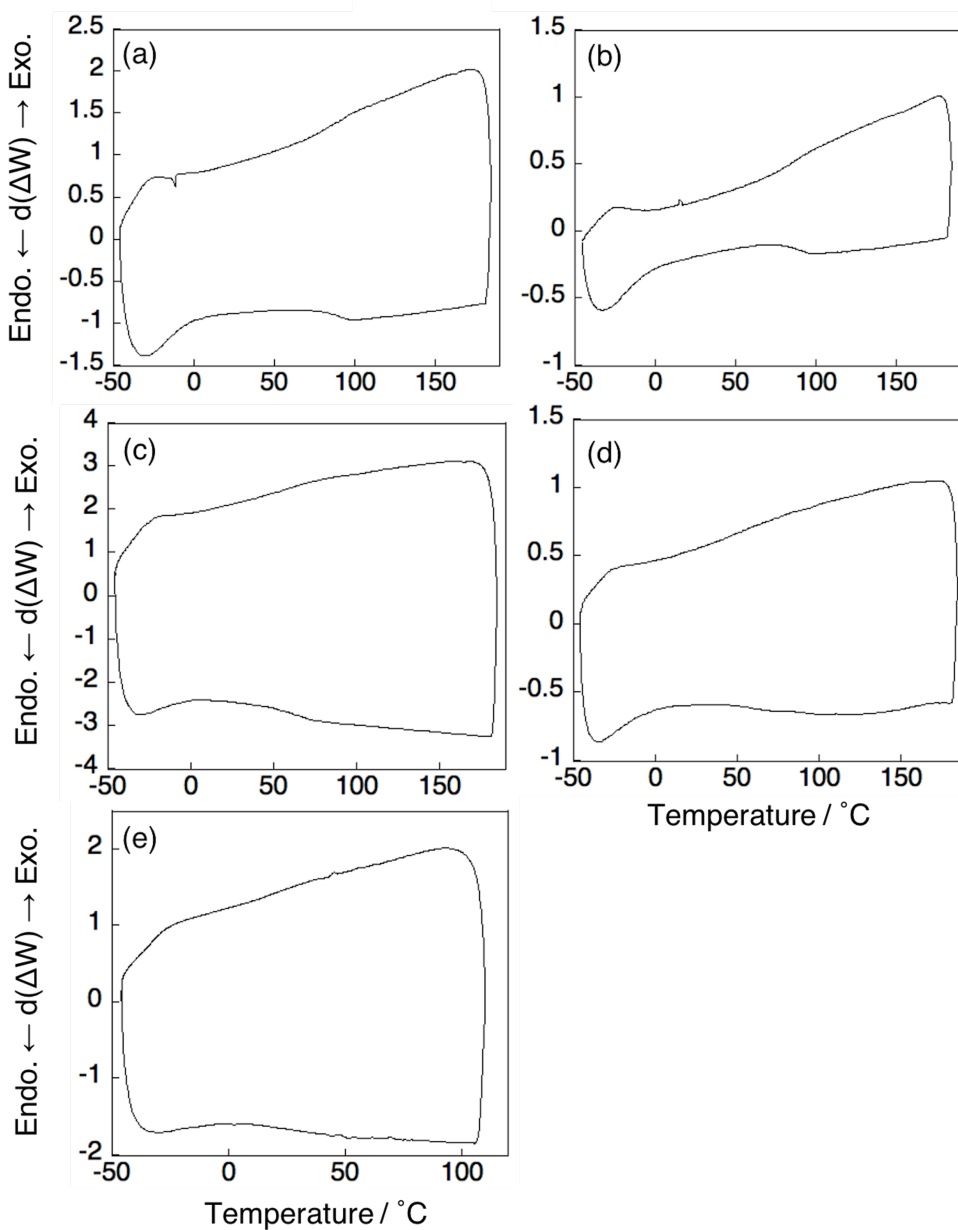

**Figure S8.** DSC curves of p(DDA/TMSPA) for the third heating and cooling process at a rate of  $10\text{ }^{\circ}\text{C min}^{-1}$  under nitrogen atmosphere. (a) p(DDA/TMSPA1), (b) p(DDA/TMSPA2), (c) p(DDA/TMSPA13), (d) p(DDA/TMSPA13) which was run 1 of Table S1 and (e) p(DDA/TMSPA32).

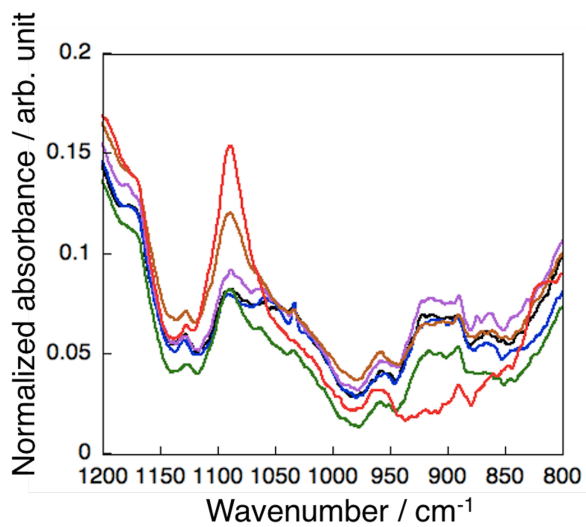

**Figure S9.** Normalized FT-IR spectra of p(DDA/TMSPA2) powder. Before humid annealing (red), humid annealed for 24 h (brown), 48 h (green), 72 h (purple), 96 h (blue) and 120 h (black). The spectra were normalized using the asymmetric stretching vibration of CH<sub>2</sub>.

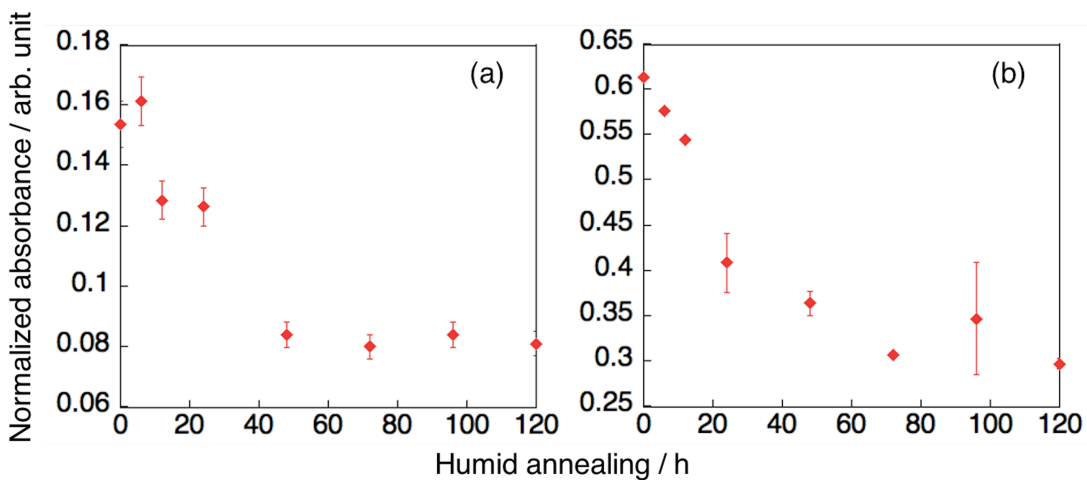

**Figure S10.** Plots for normalized absorbance of Si-OMe as humid annealing time. (a) p(DDA/TMSPA2) and (b) p(DDA/TMSPA13) powders. The absorbance was normalized using the asymmetric stretching vibration of CH<sub>2</sub>.

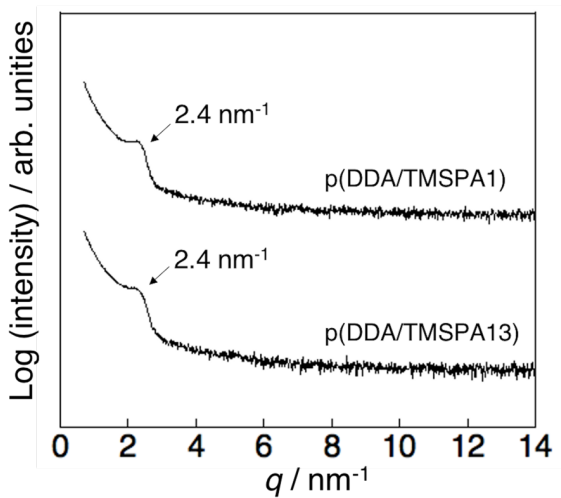

**Figure S11.** XRD patterns of p(DDA/TMSPA1) (top) and p(DDA/TMSPA13) (bottom) thin films annealed at 60 °C for 24 h.

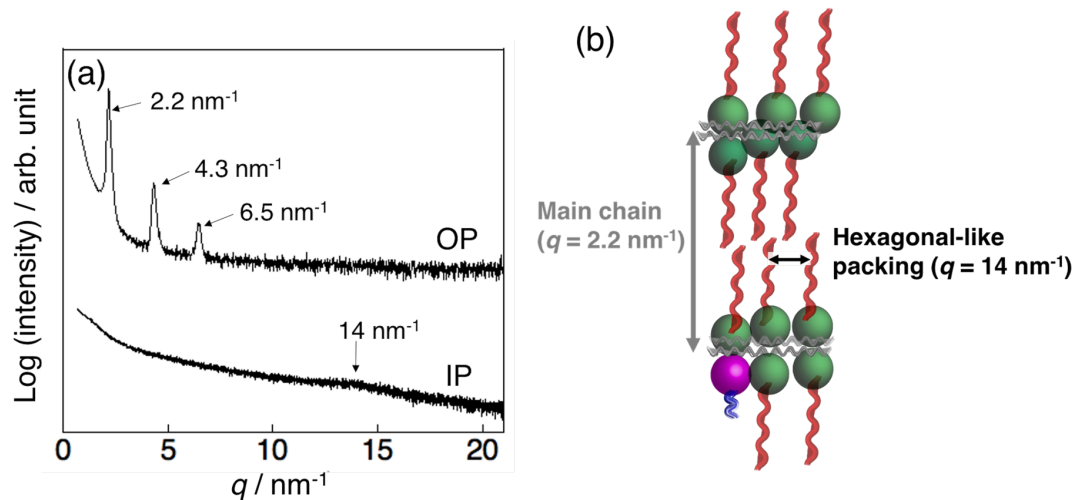

**Figure S12.** (a) XRD patterns of p(DDA/TMSPA13) thin film humid annealed at 60 °C for 96 h. In the figure, the top and bottom pattern are the pattern measured in the out-of-plane and in-plane direction, respectively. (b) Schematic image of the lamellar structure of thin films of p(DDA/TMSPA). The diffraction of short axis side of dodecyl side chains assign as hexagonal-like packing.

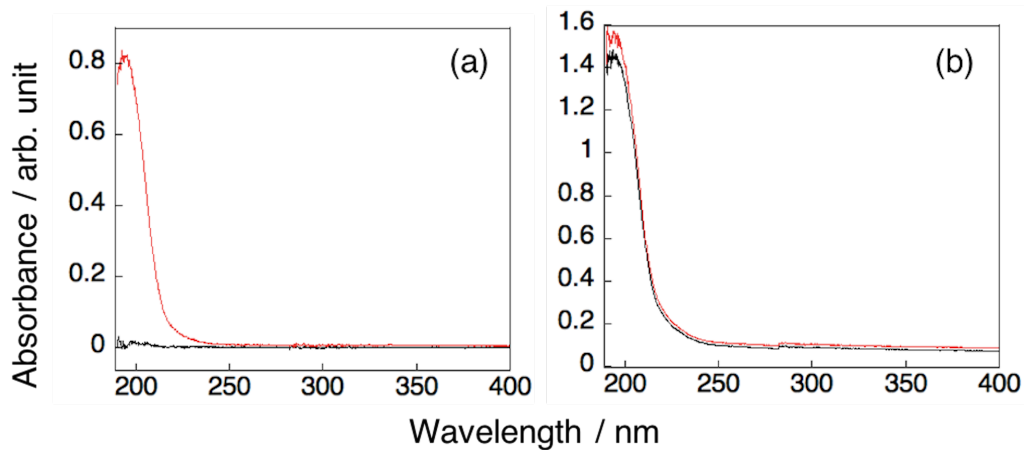

**Figure S13.** UV-vis spectra of humid-annealed p(DDA/TMSPA) thin films before (red) and after (black) dipping into toluene. (a) p(DDA/TMSPA2) and (b) p(DDA/TMSPA13) thin films.

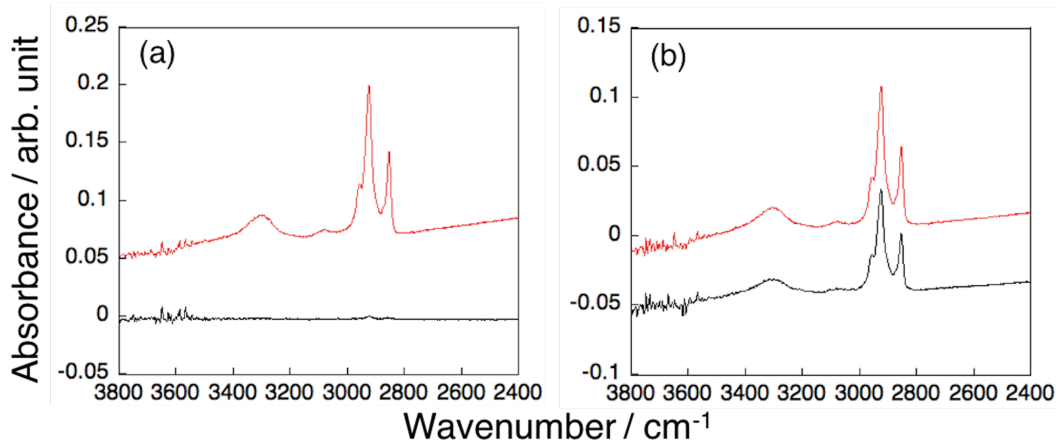

**Figure S14.** FT-IR spectra of humid annealed p(DDA/TMSPA) thin films before (red) and after (black) dipping into toluene. (a) p(DDA/TMSPA2) and (b) p(DDA/TMSPA13) thin films.

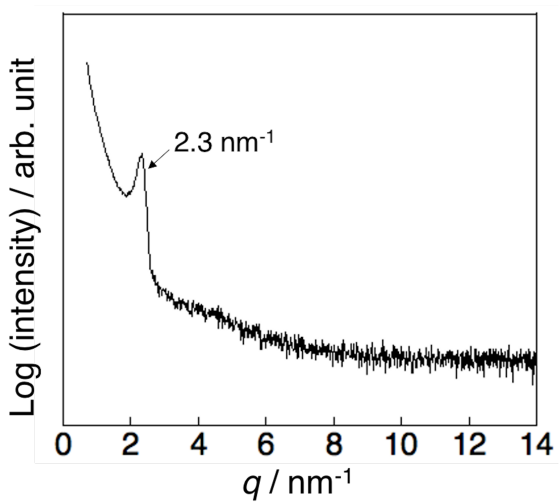

**Figure S15.** XRD pattern for toluene dipped p(DDA/TMSPA13) thin films followed by annealed at 60 °C for 24 h.



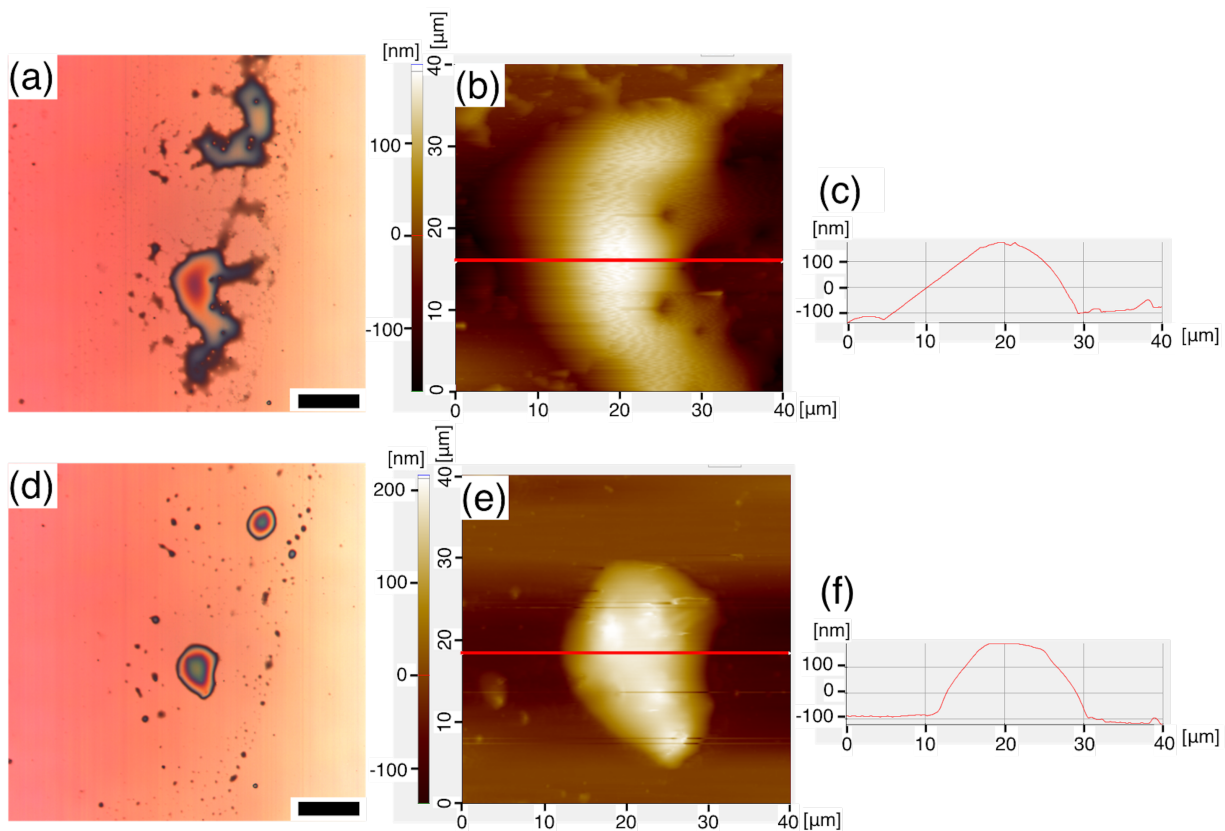

**Figure S16.** LM images and AFM topographical images of p(DDA/TMSPA13) films before (a,b) and after (d,e) humid annealing; (c,f) represent the line profiles for (b,e), respectively. (Scale bar: 25  $\mu\text{m}$ ).
